# Supplementary material
Source: PubMed Central journal article supplement (PMC2651257)
Supplement: 0806782106_Appendix_PDF.pdf [file 0806782106_Appendix_PDF.pdf]

**Table S1. Oligonucleotide sequences for generating constructs**

| Construct                 | Forward Oligonucleotides (5' to 3')                                                    | Reverse Oligonucleotides (5' to 3')                               |
|---------------------------|----------------------------------------------------------------------------------------|-------------------------------------------------------------------|
| GOF5                      | GGCCG <u>AATTC</u> TCTTCAAAATTATAACATTTTCATGTTGTG                                      | GGCCG <u>GATCC</u> TTTTATTGTCGTGCCATTTTGTTTTTATTACG               |
| GOF7                      | CGCGCG <u>GAATTC</u> AAAAATTACTATGTTTATTTTCGAAATTTAGAAAAACG                            | GGTCACG <u>AATTC</u> CAAGAAAATTTTGCCTGAAAACTTTTTTTATTG            |
| GOF9                      | CACAATTCACACATTATACGAGCCGG                                                             | TCTAGAG <u>GATCC</u> CCGGGTACCGAGCTCGTGTGGTTTTCTTCGCTTTTCATTAC    |
| GOF10                     | GTGCCC <u>GAATTC</u> AAGCCTAGAAAAACGAAGAGTTAC                                          | CTAGAG <u>GATCC</u> CCGGGTAC                                      |
| GOF11                     | GTGCCC <u>GAATTC</u> AAGCCTAGAAAAACGAAGAGTTAC                                          | TCTAGAG <u>GATCC</u> CCGGGTACCGAGCTCGTTTCTTGATTGTCGTGCCATTTTG     |
| GOF12                     | GTGCCC <u>GAATTC</u> AAGCCTAGAAAAACGAAGAGTTAC                                          | TCTAGAG <u>GATCC</u> CCGGGTACCGAGCTCGTGTGGTTTTCTTCGCTTTTCATTAC    |
| GOF13                     | <u>AATTC</u> GAAAAGCGAAGAAAAGCGAAG                                                     | <u>GATCC</u> TTTCGCTTTTCTTCGCTTTTCG                               |
| GOF14                     | <u>AATTC</u> GAAAAGCGAAG                                                               | <u>GATCC</u> TTTCGCTTTTCG                                         |
| GOF15                     | <u>AATTC</u> GAAAAGCGAAGAAAAGCGAAG                                                     | <u>GATCC</u> TTTCGCTTTTCTTCGCTTTTCG                               |
| GOF16                     | <u>AATTC</u> GAAAAGCGAAGAAAAGCGAAGAAAAGCGAAGAAAAGCGAAGAAAAGCGAAG                       | <u>GATCC</u> TTTCGCTTTTCTTCGCTTTTCTTCGCTTTTCTTCGCTTTTCTTCGCTTTTCG |
| pBSG564-662               | GGCCGGATCCAAAGTTTTTCACGCAAAATTTTCTTGG                                                  | GGCCTCTAGAGATCAATTCCACAGTTTTTCGCGATC                              |
| G564 -883/-874            | <u>AATTC</u> TCAAAGCCTATCAAAGCCTAG                                                     | <u>GATCC</u> TAGGCTTTGATAGGCTTTGAG                                |
| G564 -836/-827            | <u>AATTC</u> GAAAACCCACAGAAAACCCACAG                                                   | <u>GATCC</u> TGTGGTTTTCTGTGGTTTTTCG                               |
| G564 -823/-814            | <u>AATTC</u> TAAAAACAAATAAAAACAAAG                                                     | <u>GATCC</u> TTTGTTTTTATTGTTTTTTAG                                |
| GA 20-OXIDASE +222/+213   | <u>AATTC</u> GAAAAGAGAAGGAAAAGAGAAG                                                    | <u>GATCC</u> TTCTCTTTCCCTTCTCTTTCCG                               |
| GA 20-OXIDASE +215/+206   | <u>AATTC</u> GAAAAGAGGAGAAAAGAGGAG                                                     | <u>GATCC</u> TCCTCTTTTCTCCTCTTTTCG                                |
| GA 20-OXIDASE -2498/-2489 | <u>AATTC</u> GAAATAGAGAAGAATAGAGAAG                                                    | <u>GATCC</u> TTCTCTATTCTTCTCTATTTCG                               |
| GA 20-OXIDASE -1410/-1419 | <u>AATTC</u> GAAAAGCAAGGAAAAGCAAGG                                                     | <u>GATCC</u> TTTGCTTTTCTTCGCTTTTCG                                |
| PcWOX9-like +94/+85       | <u>AATTC</u> GAGAAGGGAAGAGAAGGGAAG                                                     | <u>GATCC</u> TTCCCTTCTCTTCCCTTCTCG                                |
| PcWOX9-like +365/+356     | <u>AATTC</u> TAAAAGGGAATAAAAAGGGAAG                                                    | <u>GATCC</u> TTCCCTTTTATTCCTTTTAG                                 |
| PcWOX9-like -3186/-3195   | <u>AATTC</u> GAAAAGGGTAGAAAAGGGTAG                                                     | <u>GATCC</u> TACCTTTTCTACCTTTTCG                                  |
| PcWOX9-like -2699/-2708   | <u>AATTC</u> GAAAACGACGAAAACGACG                                                       | <u>GATCC</u> GTCTTTTTCTGCTTTTCG                                   |
| PcWOX9-like -282/-273     | <u>AATTC</u> GAAAATAGAAGAAAATAGAAG                                                     | <u>GATCC</u> TTCTATTTTCTTCTATTTTCG                                |
| PcWOX9-like -732/-741     | <u>AATTC</u> GAAAAAGAAGAAAAAGAAG                                                       | <u>GATCC</u> TTCTTTTTTCTTCTTTTTTCG                                |
| PtNIP1;1 -814/-805        | <u>AATTC</u> GAAATGCAAAGAATTGCAAAG                                                     | <u>GATCC</u> TTTGCAATTCTTTGCAATTTCG                               |
| PtNIP1;1 -725/-716        | <u>AATTC</u> GTAAATGAAGTAAATGGAAG                                                      | <u>GATCC</u> TTCAATTTACTTCAATTTACG                                |
| PtNIP1;1 -615/-624        | <u>AATTC</u> GTAAAGAGAAGTAAAGAGAAG                                                     | <u>GATCC</u> TTCTCTTTACTTCTCTTTACG                                |
| PtNIP1;1 -528/-537        | <u>AATTC</u> CAATAACGAACAATAACGAAG                                                     | <u>GATCC</u> TTCTGTTATTGTTCTGTTATTGG                              |
| M1                        | GGTACCAG <u>AATTC</u> <u>GGCCGCGGGGGGCC</u> CATGTTGTTGTTTGTTCAAAGC                     | CTAGAG <u>GATCC</u> CCGGGTAC                                      |
| M2                        | GTACCAG <u>AATTC</u> AATTTATAACATTTT <u>GGCCGCGGGGGGCC</u> TCAAAGCCTA<br>GAAAAACGAAGAG | CTAGAG <u>GATCC</u> CCGGGTAC                                      |
| M3 5'-fragment            | GGTACCAG <u>AATTC</u> AATTTATAACATTTTCATGTTGTTGTTG                                     | CTCTTCGTGGGCCCGCGGCCAACAAACACAACATGAAAATGTTATAA                   |
| M3 3'-fragment            | TGTTTGTGGCCGCGGGGGGCCACGAAGGTTACTATTGGTAATGAAAAG                                       | CTAGAG <u>GATCC</u> CCGGGTAC                                      |
| M4 5'-fragment            | GGTACCAG <u>AATTC</u> AATTTATAACATTTTCATGTTGTTGTTG                                     | CATTACCAGGGCCCGCGGCCTTTTCTAGGCTTTGAAACAAAC                        |

| <b>Construct</b> | <b>Forward Oligonucleotides (5' to 3')</b>                                  | <b>Reverse Oligonucleotides (5' to 3')</b>                                     |
|------------------|-----------------------------------------------------------------------------|--------------------------------------------------------------------------------|
| M4 3'-fragment   | CTAGAAAAGGCCGCGGGGGGCCCTGGTAATGAAAAGCGAAGAAAAC                              | CTAGAGGATCCCGGGTAC                                                             |
| M5 5'-fragment   | GGTACCAGAATTCAATTATAACATTTTCATGTTGTGTTTG                                    | GTTTTCTTGGGCCCGCGGCCATAGTAACTCTTCGTTTTCTAGGCTTTG                               |
| M5 3'-fragment   | GTTACTATGGCCGCGGGGGGCCAAGAAAACACATAATAAAAACAAAATG                           | CTAGAGGATCCCGGGTAC                                                             |
| M6 5'-fragment   | GGTACCAGAATTCAATTATAACATTTTCATGTTGTGTTTG                                    | TGTTTTTAGGGCCCGCGGCCCGCTTTTCATTACCAATAGTAACTC                                  |
| M6 3'-fragment   | GAAAAGCGGGCCGCGGGGGGCCATAAAAACAAAATGGCACGACAATCAAG                          | CTAGAGGATCCCGGGTAC                                                             |
| M7 5'-fragment   | GGTACCAGAATTCAATTATAACATTTTCATGTTGTGTTTG                                    | ATTGTCGTGGGCCCGCGGCCCTTATGTGGTTTTCTTCGCTTTTC                                   |
| M7 3'-fragment   | CCACATAAGGCCGCGGGGGGCCACGACAATCAAGAAAAGTTTTAC                               | CTAGAGGATCCCGGGTAC                                                             |
| M8 5'-fragment   | GGTACCAGAATTCAATTATAACATTTTCATGTTGTGTTTG                                    | GAAAACCTGGGCCCGCGGCCGCCATTTTGTTTTTATTATGTGG                                    |
| M8 3'-fragment   | AAAATGGCGGGCCGCGGGGGGCCAAGTTTTACACAAAACTTTTTC                               | CTAGAGGATCCCGGGTAC                                                             |
| M9               | GGTACCAGAATTCAATTATAACATTTTCATGTTGTGTTTG                                    | TAGAGGATCCCGGGTACCGAGCTCGAATTTTGAAAAAGTGGGCCCGCGGCC<br>TTTCTTGATTGTCGTGCC      |
| M10              | GGTACCAGAATTCAATTATAACATTTTCATGTTGTGTTTG                                    | TAGAGGATCCCGGGTACCGAGCTCGGGGCCCGCGGCCCTTGTGTGAAAACCT<br>TTTCTTGATTG            |
| 15-bp NEGATIVE   | <u>AATTCGGCCGCGGGGGGCCCGAGCTCGGTACCCGGG</u>                                 | <u>GATCCCGGGTACCGAGCTCGGGGCCCGCGGCCG</u>                                       |
| M11              | AAGCTGGAATTC AAGCCTACGGGGGGCCGAGTTACTATTGGTAATGAAAAG                        | TCTAGAGGATCCCGGGTACCGAGCTCGTGTG                                                |
| M12              | CACAATTCACACATTATACGAGCCGG                                                  | TAGAGGATCCCGGGTACCGAGCTCGTGTGGTTTTCGGGCCCCCGATTACCAATA<br>GTAACCTTCGT          |
| M13              | AAGCTGGAATTC AAACCTAGAAAAACGAAGAGTTAC                                       | TCTAGAGGATCCCGGGTACCGAGCTCGTGTG                                                |
| M14              | CACAATTCACACATTATACGAGCCGG                                                  | TAGAGGATCCCGGGTACCGAGCTCGTGTGGTTTTCTTCGCTTTTCATTACTAATA<br>GTAACCTTCGTTTTTCTAG |
| M15 5'-fragment  | ACCAGTTTCCTCAAGGGTCC                                                        | CGAAGTTCATGCCAGTCCAGCGCCGCGCCGATCCTTCGCTTTTCGAATTC                             |
| M15 3'-fragment  | CTGGCATGAACTTCGGTCCGCGGGGGGCCATTAATTAATTAATTTTCATTT<br>ACTTTTTTCC           | CCAGTTGCAACCACCTGT                                                             |
| M16 5'-fragment  | ACCAGTTTCCTCAAGGGTCC                                                        | CGAAGTTCATGCCAGTCCAGCGCCGCGGCCATATATAACTTTCTGCGCACCAAGA                        |
| M16 3'-fragment  | CTGGCATGAACTTCGGTCCGCGGGGGGCCAGTTAAATTATTATTATTTCA<br>TTTAAAAATATAAATATT    | CCAGTTGCAACCACCTGT                                                             |
| M17 5'-fragment  | ACCAGTTTCCTCAAGGGTCC                                                        | CGAAGTTCATGCCAGTCCAGCGCCGCGGCCCTTAAAAATAAAAAGGAAAAAGTAAA<br>TGA                |
| M17 3'-fragment  | CTGGCATGAACTTCGGTCCGCGGGGGGCCATATAAAAAATATAACCTTAAT<br>CAAAACAAAGC          | CCAGTTGCAACCACCTGT                                                             |
| M18 5'-fragment  | ACCAGTTTCCTCAAGGGTCC                                                        | CGAAGTTCATGCCAGTCCAGCGCCGCGGCCCTTAAATAATATTTATATTTTAAATGA<br>AAATAATAATAATT    |
| M18 3'-fragment  | CTGGCATGAACTTCGGTCCGCGGGGGGCCCTTACAACTTTTAACCTTAA<br>AATTAACCTT             | CCAGTTGCAACCACCTGT                                                             |
| M19 5'-fragment  | ACCAGTTTCCTCAAGGGTCC                                                        | CGAAGTTCATGCCAGTCCAGCGCCGCGGCCCTTTAGATTAAGGCTTTGTTTTGATT<br>AA                 |
| M19 3'-fragment  | CTGGCATGAACTTCGGTCCGCGGGGGGCCCTAGTGTGACAACTAAAAAGTT<br>GTATACAAC            | CCAGTTGCAACCACCTGT                                                             |
| M20 5'-fragment  | ACCAGTTTCCTCAAGGGTCC                                                        | CGAAGTTCATGCCAGTCCAGCGCCGCGGCCCTCATTTCCTTTTAAAGTTAATTTA<br>AGG                 |
| M20 3'-fragment  | CTGGCATGAACTTCGGTCCGCGGGGGGCCAGAAAATAAATATATAATAAAA<br>GAGTAAATTTGTAATTAATG | CCAGTTGCAACCACCTGT                                                             |
| M21 5'-fragment  | ACCAGTTTCCTCAAGGGTCC                                                        | CGAAGTTCATGCCAGTCCAGCGCCGCGGCCAAACCTATGACAGGGTTGTATACAAC<br>TT                 |

| <b>Construct</b> | <b>Forward Oligonucleotides (5' to 3')</b>                                                 | <b>Reverse Oligonucleotides (5' to 3')</b>                                             |
|------------------|--------------------------------------------------------------------------------------------|----------------------------------------------------------------------------------------|
| M21 3'-fragment  | <u>CTGGCATGA</u> <u>ACTTCGGTCCGCGGGGGCC</u> CATAAAAAAGTATTAATAAATA<br>ATATTTAGAGTAGTAATATG | CCAGTTGCAACCACCTGT                                                                     |
| M22 5'-fragment  | ACCAGTTTCCTCAAGGGTCC                                                                       | <u>CGAAGTTCATGCCAGTCCAGCGCCGCGGCC</u> ATCATTTAATTACAAATTTACTCTTT<br>ATTATATATATTTATTTT |
| M22 3'-fragment  | <u>CTGGCATGA</u> <u>ACTTCGGTCCGCGGGGGCC</u> CATATAAAAAATGTGGTTGTCC<br>ATATATC              | CCAGTTGCAACCACCTGT                                                                     |
| M23 5'-fragment  | ACCAGTTTCCTCAAGGGTCC                                                                       | <u>CGAAGTTCATGCCAGTCCAGCGCCGCGGCC</u> CAACCATATTACTACTCTAAATATTAT<br>TATTTTAATACTTT    |
| M23 3'-fragment  | <u>CTGGCATGA</u> <u>ACTTCGGTCCGCGGGGGCC</u> TATCATGACAAATATTTTCACC<br>GAAA                 | CCAGTTGCAACCACCTGT                                                                     |
| M24 5'-fragment  | ACCAGTTTCCTCAAGGGTCC                                                                       | <u>CGAAGTTCATGCCAGTCCAGCGCCGCGCC</u> TTTTAAAGTGAATAATGATATATGGA<br>CAACC               |
| M24 3'-fragment  | <u>CTGGCATGA</u> <u>ACTTCGGTCCGCGGGGGCC</u> CGTGGATAATGGAAAAATAC<br>AA                     | CCAGTTGCAACCACCTGT                                                                     |
| M25 5'-fragment  | ACCAGTTTCCTCAAGGGTCC                                                                       | <u>CGAAGTTCATGCCAGTCCAGCGCCGCGGCC</u> CTTTTTCGTTCTTTCCATCTTTTCG                        |
| M25 3'-fragment  | <u>CTGGCATGA</u> <u>ACTTCGGTCCGCGGGGGCC</u> GCATAACATTTTGTATTAGTGA<br>TGAGTTTT             | CCAGTTGCAACCACCTGT                                                                     |
| M26 5'-fragment  | ACCAGTTTCCTCAAGGGTCC                                                                       | <u>CGAAGTTCATGCCAGTCCAGCGCCGCGCC</u> AAAGTACTGGAGGGAGATTGCTTG                          |
| M26 3'-fragment  | <u>CTGGCATGA</u> <u>ACTTCGGTCCGCGGGGGCC</u> CAGAATATAGGAAAATTTTAGAA<br>TCACGTGG            | CCAGTTGCAACCACCTGT                                                                     |
| M27 5'-fragment  | ACCAGTTTCCTCAAGGGTCC                                                                       | <u>CGAAGTTCATGCCAGTCCAGCGCCGCGCC</u> AAATATATATGATAAAAACTCATCA<br>CTAATACAA            |
| M27 3'-fragment  | <u>CTGGCATGA</u> <u>ACTTCGGTCCGCGGGGGCC</u> TAATATTTTAATTTATAATGTA<br>GTTGATTTTATTG        | CCAGTTGCAACCACCTGT                                                                     |
| M28 5'-fragment  | ACCAGTTTCCTCAAGGGTCC                                                                       | <u>CGAAGTTCATGCCAGTCCAGCGCCGCGCC</u> CTATTATATAGCTATCCACGTGATTC<br>TAAAA               |
| M28 3'-fragment  | <u>CTGGCATGA</u> <u>ACTTCGGTCCGCGGGGGCC</u> CATACATAAATATGTGTTGATAG<br>TGGGTGA             | CCAGTTGCAACCACCTGT                                                                     |

Underlined nucleotides are incorporated restriction sites.

Nucleotides shown in blue are a part of the 15-bp mutation sequence.

Nucleotides shown in green are a part of the 45-bp mutation sequence.
